# Supplementary material for: Mannose Receptor Deficiency Impacts Bone Marrow and Circulating Immune Cells during High Fat Diet Induced Obesity
Source: Metabolites. 2022 Dec 1;12(12):1205. doi: 10.3390/metabo12121205 (PMC9784906; doi:10.3390/metabo12121205)
Supplement: Supplementary file 1 [file metabolites-12-01205-s001.zip]

Archive with 7 entries (7 files):
- Supplementary Figure 1.png
- Supplementary Figure 2.png
- Supplementary Figure 3.png
- Supplementary Figure 4.png
- Supplementary Figure 5.png
- Supplementary Figure 6.png
- supplementary revised.pdf
